# Supplementary material
Source: PubMed Central journal article supplement (PMC30635)
Supplement: pnas_98_6_3226__1.pdf [file pnas_98_6_3226__1.pdf]

TABLE 2. Enthalpic (kcal/mol) and entropic (cal/mol·K) nearest-neighbor parameters for matches and single-nucleotide mismatches at 37°C and  $[\text{Na}^+] = 1.0 \text{ M}$  compiled by J. SantaLucia Jr.

| Nucleotide matches |            |            | Single nucleotide mismatches |            |            |         |            |            |         |            |            |         |            |            |         |            |            |
|--------------------|------------|------------|------------------------------|------------|------------|---------|------------|------------|---------|------------|------------|---------|------------|------------|---------|------------|------------|
| NN Pair            | $\Delta H$ | $\Delta S$ | NN Pair                      | $\Delta H$ | $\Delta S$ | NN Pair | $\Delta H$ | $\Delta S$ | NN Pair | $\Delta H$ | $\Delta S$ | NN Pair | $\Delta H$ | $\Delta S$ | NN Pair | $\Delta H$ | $\Delta S$ |
| AA / TT            | -7.9       | -22.2      | AA / TA                      | 1.2        | 1.7        | GG / CG | -6.0       | -15.8      | GA / CG | -0.6       | -1.0       | TA / AC | 3.4        | 8.0        | AG / TT | 1.0        | 0.9        |
| AT / TA            | -7.2       | -20.4      | CA / GA                      | -0.9       | -4.2       | TG / AG | 1.6        | 3.6        | GG / CA | 0.5        | 3.2        | TC / AA | 7.6        | 20.2       | AT / TG | -2.5       | -8.3       |
| TA / AT            | -7.2       | -21.3      | GA / CA                      | -2.9       | -9.8       | AT / TT | -2.7       | -10.8      | TA / AG | 0.7        | 0.7        | AC / TT | 0.7        | 0.2        | CG / GT | -4.1       | -11.7      |
| CA / GT            | -8.5       | -22.7      | TA / AA                      | 4.7        | 12.9       | CT / GT | -5.0       | -15.8      | TG / AA | 3.0        | 7.4        | AT / TC | -1.2       | -6.2       | CT / GG | -2.8       | -8.0       |
| GT / CA            | -8.4       | -22.4      | AC / TC                      | 0.0        | -4.4       | GT / CT | -2.2       | -8.4       | AA / TC | 2.3        | 4.6        | CC / GT | -0.8       | -4.5       | GG / CT | 3.3        | 10.4       |
| CT / GA            | -7.8       | -21.0      | CC / GC                      | -1.5       | -7.2       | TT / AT | 0.2        | -1.5       | AC / TA | 5.3        | 14.6       | CT / GC | -1.5       | -6.1       | GT / CG | -4.4       | -12.3      |
| GA / CT            | -8.2       | -22.2      | GC / CC                      | 3.6        | 8.9        | AA / TG | -0.6       | -2.3       | CA / GC | 1.9        | 3.7        | GC / CT | 2.3        | 5.4        | TG / AT | -0.1       | -1.7       |
| CG / GC            | -10.6      | -27.2      | TC / AC                      | 6.1        | 16.4       | AG / TA | -0.7       | -2.3       | CC / GA | 0.6        | -0.6       | GT / CC | 5.2        | 13.5       | TT / AG | -1.3       | -5.3       |
| GC / CG            | -9.8       | -24.4      | AG / TG                      | -3.1       | -9.5       | CA / GG | -0.7       | -2.3       | GA / CC | 5.2        | 14.2       | TC / AT | 1.2        | 0.7        |         |            |            |
| GG / CC            | -8.0       | -19.9      | CG / GG                      | -4.9       | -15.3      | CG / GA | -4.0       | -13.2      | GC / CA | -0.7       | -3.8       | TT / AC | 1.0        | 0.7        |         |            |            |

Average values for double mismatches (1):  $\Delta H = 2.8 \text{ kcal/mol}$ ,  $\Delta S = 6.5 \text{ cal/mol}\cdot\text{K}$ .

Average values for initiation cost (2):  $\Delta H = 2.4 \text{ kcal/mol}$ ,  $\Delta S = 1.3 \text{ cal/mol}\cdot\text{K}$ .

Average values for dangling ends contribution (3):  $\Delta H = -2.5 \text{ kcal/mol}$ ,  $\Delta S = -7.0 \text{ cal/mol}\cdot\text{K}$ .

Sodium concentration correction for  $N$ -nucleotide duplex (2):  $\Delta S = (0.368 \text{ cal/mol}\cdot\text{K}) \cdot N \cdot \ln [\text{Na}^+]$ .

## References:

1. Allawi, H.T. & SantaLucia, J., Jr. (1997) *Biochemistry* **36**, 10581–10594.
2. SantaLucia, J., Jr. (1998) *Proc. Natl. Acad. Sci. USA* **95**, 1460–1465.
3. Bommarito, S., Peyret, N., & SantaLucia, J., Jr. (2000) *Nucleic Acids Res.* **28**, 1929–1934.
