# Supplementary material
Source: PubMed Central journal article supplement (PMC30635)
Supplement: pnas_98_6_3226__2.pdf [file pnas_98_6_3226__2.pdf]

TABLE 3. Comparison of melting temperature predictions for different duplexes of fragmented subtilisin E gene between the proposed model and  $T_m = 81.5 + 0.41(\% GC) - 500/L + 16.6 \log [\text{Na}^+]$ .

| Sequence positions | Overlap length | Percent GC | Melting temperature ( $^{\circ}\text{C}$ ) |                          |
|--------------------|----------------|------------|--------------------------------------------|--------------------------|
|                    |                |            | Annealing model                            | Howley <i>et al.</i> (1) |
| 819-828            | 10             | 50         | 26                                         | 30                       |
| 1013-1022          | 10             | 30         | 17                                         | 22                       |
| 529-538            | 10             | 60         | 32                                         | 35                       |
| 804-828            | 25             | 52         | 61                                         | 61                       |
| 779-828            | 50             | 50         | 72                                         | 71                       |
| 729-828            | 100            | 55         | 81                                         | 78                       |

Data shown is for  $[\text{Na}^+] = 0.05 \text{ M}$  and an initial template mole fraction  $x_A^0 = 2.7 \times 10^{-8}$  that corresponds to a DNA concentration of 10 mg/liter, typical for DNA shuffling.

#### References:

1. Howley, P.M., Israel, M.F., Law, M., & Martin, M.A. (1979) *J. Biol. Chem.* **254**, 4876–4883.
