# Supplementary material
Source: PubMed Central journal article supplement (PMC30635)

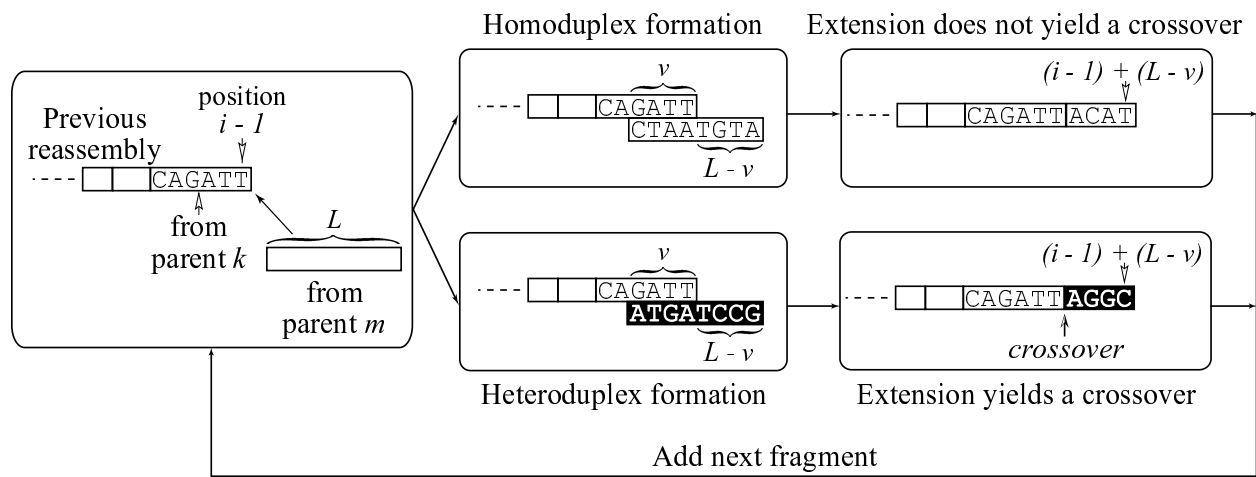

FIGURE 6

Supplement: pnas_98_6_3226__4.pdf [file pnas_98_6_3226__4.pdf]
